# Supplementary material for: Impact of Coronavirus Disease 2019 (COVID-19) Outbreak Quarantine, Isolation, and Lockdown Policies on Mental Health and Suicide
Source: Frontiers journal article supplement (doi:10.3389/fpsyt.2021.565190), 2021-04-16
Supplement: Table_1.docx [file Table_1.docx]

**TABLE 1 Impact of Covid 19 and suicides (up to May 2020)**

| **Case study/ No.** | **Age** | **Place** | **Occupation/Remarks/Name** | **Gender** | **Risk factors for suicides** | **References** |
| --- | --- | --- | --- | --- | --- | --- |
| 1 | 37 | Kerala, India | - | M | Alcohol addict/ Feeling depressed due to unavailability of liquor | https://news.abplive.com/news/india/coronavirus-lockdown-kerala-man-commits-suicide-after-govt-shuts-liquor-shops-1183618 |
| 2 | 50 | Dakshina Kannada, Karnataka district, India | Rubber tapping labourer/ Name:  Thomas | M | Alcohol addict/ Feeling depressed due to unavailability of liquor | https://www.indiatoday.in/india/story/frustrated-at-not-being-able-to-get-liquor-during-lockdown-2-commit-suicide-in-karnataka-1661060-2020-03-29# |
| 3 | 70 | Karnataka, India | Rubber tapping labourer/ Name:  Tommy | M | Alcohol addict/ Feeling depressed and frustrated due to unavailability of liquor | https://www.indiatoday.in/india/story/frustrated-at-not-being-able-to-get-liquor-during-lockdown-2-commit-suicide-in-karnataka-1661060-2020-03-29# |
| 4 | 37 | Pakistan | Fawad Abbasi | M | Drug Addict/ he was suspected for Covid -19 infection and admitted in the Jinnah Postgraduate Medical Centre, Pakistan. But he jumped from the third-floor isolation ward and committed suicide. But his Covid-19 test result showed that he was not infected from coronavirus. | https://www.dawn.com/news/1552729/addict-with-covid-19-symptoms-commits-suicide-at-jpmc |
| 5 | - | Chengalpat District, Tamilnadu, India | 3 persons: Shivasankar Pradeep and Sivaraman | M | Alcohol addicts: Habitual drinkers/Consumed paint and varnish as an alternative for due to unavailability of liquor | https://www.indiatoday.in/india/story/unable-to-get-liquor-3-men-die-in-tamil-nadu-after-drinking-paint-and-varnish-1663775-2020-04-06 |
| 6 | 27 | Tamilnadu, India | Fisherman/ Arunpandian | M | Consumed aftershave mixed with soda as a substitute for alcohol | https://www.newindianexpress.com/states/tamil-nadu/2020/apr/04/craving-alcohol-amid-lockdown-two-tn-men-die-after-drinking-aftershave-mixed-with-soda-2125733.html |
| 7 | 35 | Tamilnadu, India | Fisherman /Hasan Mydeen, 35 | M | Consumed aftershave mixed with soda as a substitute for alcohol | https://timesofindia.indiatimes.com/city/chennai/three-alcoholics-in-tn-consume-after-shave-lotion-laced-soft-drinks-two-die/articleshow/74981848.cms |
| 8 | 28 | Kerala, India | Name: KC Vigil |  | Restlessness due to unavailability of liquor to drink | https://bangaloremirror.indiatimes.com/news/india/frustrated-over-not-getting-alcohol-one-more-man-commits-suicide-in-kerala/articleshow/74866273.cms |
| **Migrant worker** | | | | | | |
| 9 | 22 | Kerala, India | Migrant worker/ Asif Iqbal Mondal | M | He committed suicide as he did not have money to book the ticket to return to his hometown in Kolkata | https://www.deccanchronicle.com/nation/current-affairs/100520/unable-to-return-home-migrant-labourer-from-bengal-ends-life-in-keral.html |
| **Fear & Anxiety over COVID-19 CASES** | | | | | | |
| 10 | 53 | Gurgaon, India | Businessman | M | He committed suicide after his wife tested as Covid-19 positive | https://indianexpress.com/article/cities/delhi/gurgaon-54-year-old-commits-suicide-hours-after-wife-tests-positive-for-covid-19-6386371/ |
| 11 | 64 | Punjab, India | Name: Santosh Kaur | F | She had common cold, but she feared that she had infected by coronavirus. Then she committed suicide by consuming celphos. | http://timesofindia.indiatimes.com/articleshow/75000691.cms?utm_source=contentofinterest&utm_medium=text&utm_campaign=cppst |
| 12 | 40 | Shamli district Uttar Pradesh, India | - | M | He was admitted to the isolation ward as a suspected patient of Covid-19 infection. He committed suicide due to isolation | https://www.indiatoday.in/india/story/coronavirus-india-suspected-covid-19-patient-committed-suicide-up-hospital-tests-negative-1662942-2020-04-03 |
| 13 | 30 | Sidhi district Madhya Pradesh | labourer | M | He committed suicide after being quarantined in Madhya Pradesh, India | https://www.indiatvnews.com/news/india/covid-19-man-commits-suicide-after-being-quarantined-in-mp-610879 |
| 14 | 35 | Safdarajung Hospital, NewDelhi in India | Name: Tanveer Singh | M | Covid-19 screening was conducted for all passengers at the Indira Gandhi International Airport, India. During the screening process, Mr. Singh reported that he had headache. Therefore, he was admitted in the isolation ward at the Safdarajung Hospital, New Delhi on suspicion of being infected with coronavirus. Soon after admission in the isolation ward, he jumped from the hospital and committed suicide. | https://www.hindustantimes.com/india-news/covid-19-suspected-coronavirus-patient-jumps-to-death-from-hospital-building-soon-after-admission/story-gO78nJO3CIEWAudRtJLRaL.html |
| 15 | 27 | Kenya | - | F | She was sent to 14 days mandatory quarantine at the Kenya Industrial Training Institute (KITI) in Nakuru. According the media report, she committed suicide because she did not like about the conditions of the facility where she was held with other three persons. | https://face2faceafrica.com/article/covid-19-south-african-woman-quarantined-in-kenya-commits-suicide |
| 16 | 36 | Mathura, India | Former/Name: Mahendra Singh | M | Due to fear of coronavirus infection, he committed suicide without undergoing any medical test. Also, he assumed himself that he has already contracted from coronavirus infection, so he fears that he will infect to his family members and village people. | https://newsable.asianetnews.com/uttar-pradesh/cough-and-cold-patient-commit-suicide-in-mathura-up-kpt-q82aun |
| 17 | 19 |  | Waitress / Name: Emily Owen | F | She committed suicide due to coronavirus fears. In addition, she was previously diagnosed with having high-functioning autism. | https://nypost.com/2020/03/25/british-teen-dies-after-suicide-attempt-due-to-coronavirus-fears/ |
| 18 | 60 | Ariyalur district, Tamilnadu, India | Name: Narayanasamy (60) | M | Fear of infection/isolation. Mr. Narayanaswamy’s village people had informed to the government officials after he got the symptoms of fever. Then, he was taken to the Ariyalur government hospital and admitted in the isolation ward. However, he ended his life himself in the isolation ward. But his COVID-19 infection test results came as negative. | https://www.newindianexpress.com/states/tamil-nadu/2020/apr/10/elderly-man-in-coronavirus-isolation-ward-commits-suicide-in-ariyalur-general-hospital-2128486.html |
| **Stigma over coronavirus** | | | | | | |
| 19 | 35 | Bibikulam, Madurai, India | Labourer/  Name: Mustaffa | M | Mr. Mustaffa was taken to the hospital for Covid-19 testing and test results were negative. However, some of his village people took a video when he was taken to the hospital in a small van, then they circulated that video on social media. Moreover, the neighbourhood insisted him to go back to the hospital again. The hospital authority confirmed again that he had not infected with coronavirus. Unfortunately, he committed suicide on the same day of night. | http://timesofindia.indiatimes.com/articleshow/74939681.cms?utm_source=contentofinterest&utm_medium=text&utm_campaign=cppst |
| **Suicide due to missing of family members** | | | | | | |
| 20 | 32 | Uttar Pradesh, India | Name: Rakesh Soni | M | According the media report, Mr.Rakesh Soni committed suicide due to missing his wife as she had gone to her parents' place. Because was stuck at her parents’ house due to the lockdown measures in India | https://www.indiatoday.in/india/story/man-commits-suicide-as-he-missed-wife-in-lockdown-1665050-20 |
| **COVID-19 CASES** | | | | | | |
| 21 | 50 | Bangalore, India | Autorickshaw driver/Name: Syed Babu | M | Mr. Syed Babu committed suicide by jumped from the coronavirus-isolated ward due to depression, anxiety, and fear. He had been admitted for treatment for Covid-19 care. He was also diagnosed with hepatitis C infection. | https://www.thehindu.com/news/cities/bangalore/bengaluru-patient-ends-life-in-covid-19-ward/article31441997.ece |
| 22 | 30 | Government Medical College and Hospital in Akola, Maharashtra, India | - | M | He tested with positive covid-19 infection, followed by he was admitted in the isolation of war at the Government Medical College and Hospital in Akola, Maharashtra, India. However, he committed suicide attempt in the bathroom on 11th April 2020 and later he died in the hospital. | https://indianexpress.com/article/coronavirus/coronavirus-patient-assam-resident-suicide-akola-maharashtra-hospital-6357770/ |
| **Heath care professionals** | | | | | | |
| 23 | 22 | Kilpauk Medical College (KMC) hostel, Chennai, India | House surgeon | F | She was found dead at KMC hostel. Hospital authorities confirmed that she was not infected from COVID-19. Police suspected that she might be committed suicide due to stress after involving in treating covid-19 patients | https://www.indiatoday.in/india/story/medical-student-serving-covid-19-cases-found-dead-in-chennai-hostel-1673188-2020-05-01 |
| 24 | 49 | New York City, USA | Emergency Room (ER) Doctor/ Name: Dr. Lorna Breen | F | An ER doctor, Dr. Lorna Breen, contracted from Covid-19 during the time of treating the patients, and later she continued to treat the Covid-infected patients (12-hour shift) after she recovered from the coronavirus infection. However, she was sent her home again by hospital officials and soon later she was again admitted in the University of Virginia hospital for exhaustion. About a weeks later returning to home from the hospital, she committed suicide. | https://www.ndtv.com/world-news/coronavirus-new-york-doctor-lorna-breen-who-treated-covid-19-patients-commits-suicide-2220035  https://missoulian.com/news/national/an-er-doctor-who-treated-patients-after-she-recovered-from-covid-19-has-died-by/article_975c2e8f-1597-5a67-9241-79dff309c73f.html |
| **Economic issues** | | | | | | |
| 25 | 52 | Uttar Pradesh | Framer/ Name: Rambhavan Shukla | M | Mr. Rambhavan Shukla committed suicide due to non-availability of farmworkers to harvest his wheat crop. | https://www.businessinsider.in/india/news/covid-19-lockdown-farmer-commits-suicide-after-no-labourers-to-harvest-crop/articleshow/75106144.cms |

| **STRENGTH** | **WEAKNESSES** |
| --- | --- |
| **Governments**   - Helping to prevent the COVID-19 infection - Using more online technological services including health care sector services - Can use public authorities to serve and control the spread of infection - Can use national Media & TV channel to create the awareness - Using social media for spreading awareness   **Individuals**   - Regular exercise/yoga at home - Learn new skills such as learning new language, arts, painting, cooking, take care of family members - Working from home - Spending more time with family - Learning new online courses | **Governments polices/orders**   - Insufficient hospital facilities and medical equipments, including for general and mental health services - Uncertainty of Economy due to various reasons such as, Disturbed in providing essential services to public due to the closure of public and private transports, Closure of schools, universities, Partially or fully shutdown of factories and industries   **Individuals**   - Poor social interaction and Isolation - Difficult to attend social life such as meeting friends, relatives, or going to bars and social clubs - Reduced monthly income |
| **OPPORTUNITIES** | **THREATS** |
| **Governments and public health authorities**   - Implementing to control the spreading of COVID-19 infection - Can create more awareness through local and national leaders, social influential people, and religious people - Allotting appropriate funding for health care sectors - Allotting appropriate welfare funding for their citizens to manage the lockdown period - Arranging more mental health screening programs - Using media to create awareness among public to avoid the social stigma   **Individuals**   - Can do regular exercise to improve physical and mental health - Can create awareness to support the frontline workers and discourage the stigma - Being as a responsible citizen and family member to the society - Being a role model to children by stopping to drink alcohol and smoking - Learning new courses | **Governments and public health authorities**   - Damage to economy of the country - Political threat by other countries - Shortage of medical equipments and devices - Challenging to save the frontline workers from COVID-19   **Individuals**   - Difficult to do regular health checkup/follow up for those with pre-existing mental health issues such as schizophrenia, bipolar disorder, and other mental health disorders - Students - No face-to-face classroom experiences and prolonged stay at home - Affected by various psychological issues as anxiety, feeling stressed, fear, fear-induced overreactive behaviour, frustration, guilt, anger, boredom, sadness, worry, nervousness, helplessness, loneliness, insomnia, and depression - Obesity and diabetes - Suicidal thoughts - Domestic violence - Unemployment, Poverty |

**TABLE 2 SWOT: COVID-19 preventive measures (quarantine, isolation, lockdown, and social distancing) and mental health**
